# Supplementary material
Source: Springer Nature journal article supplement (https://www.springermedizin.de/resource/supplementary/12958_2010_743_MOESM1_ESM.pdf/9568386)

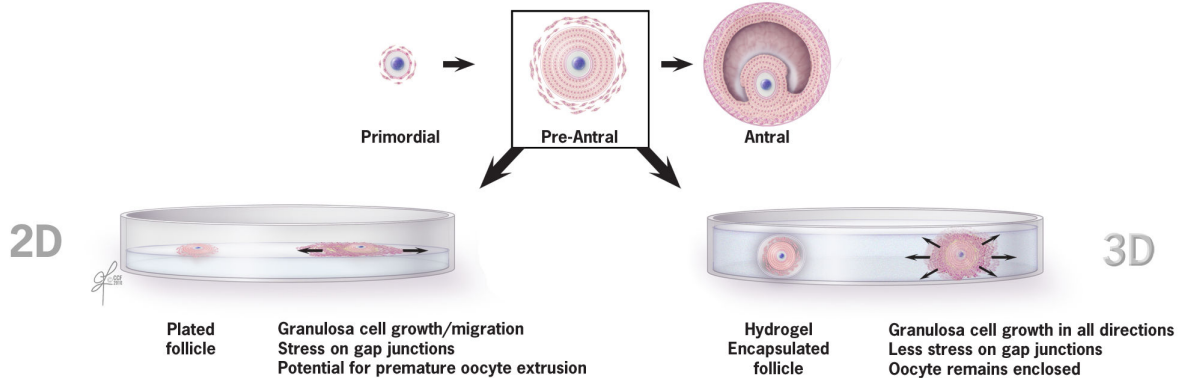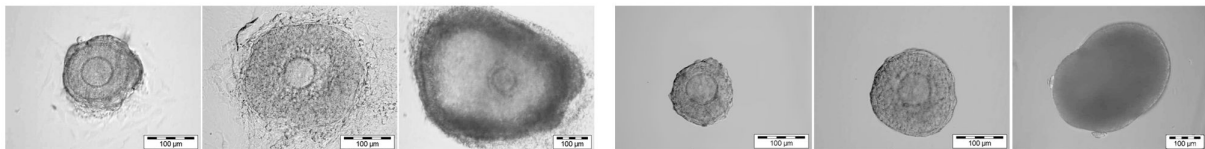

**Day 0**

**Day 4**

**Day 12**

**Day 0**

**Day 4**

**Day 12**

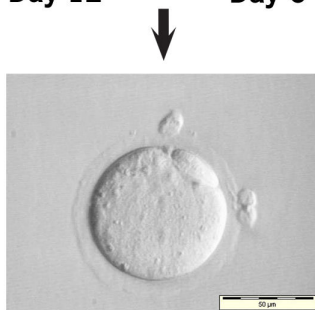

**Mature egg**

Supplement: MOESM1 [file 9568386]
